# Supplementary material for: Leveraging insurance customer data to characterize socioeconomic indicators of Swiss municipalities
Source: PLOS journal article supplement (doi:10.1371/journal.pone.0246785), 2021-03-03
Supplement: S1 (10.1371/journal.pone.0246785.s001) [file journal.pone.0246785.s001]

# Leveraging insurance customer data to characterize socioeconomic indicators of Swiss municipalities

Lorenzo Donadio<sup>1</sup>, Rossano Schifanella<sup>2, 3</sup>, Claudia R. Binder<sup>1</sup>, Emanuele Massaro<sup>1\*, ②</sup>

**1** HERUS Lab, Ecole polytechnique federale de Lausanne, ENAC, IIE, GR C1 455 (Batiment GR) - Station 2, 1015 - Lausanne, Switzerland

**2** University of Turin, Corso Svizzera 185, 10149, Turin, Italy

**3** ISI Foundation, Via Chisola 5, 10126, Turin, Italy

\* ema.massaro@gmail.com

② Now at the European Commission Joint Research Centre, Ispra, Italy

## Appendix

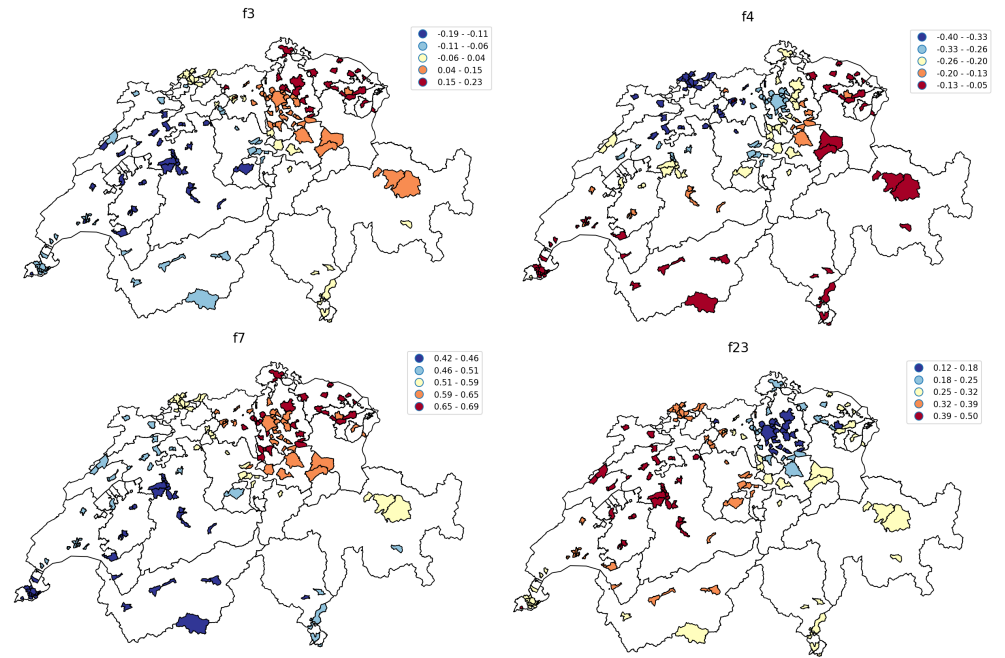

**Fig A.1.** GWR coefficients for all the features extracted as predictors for the variable p1.

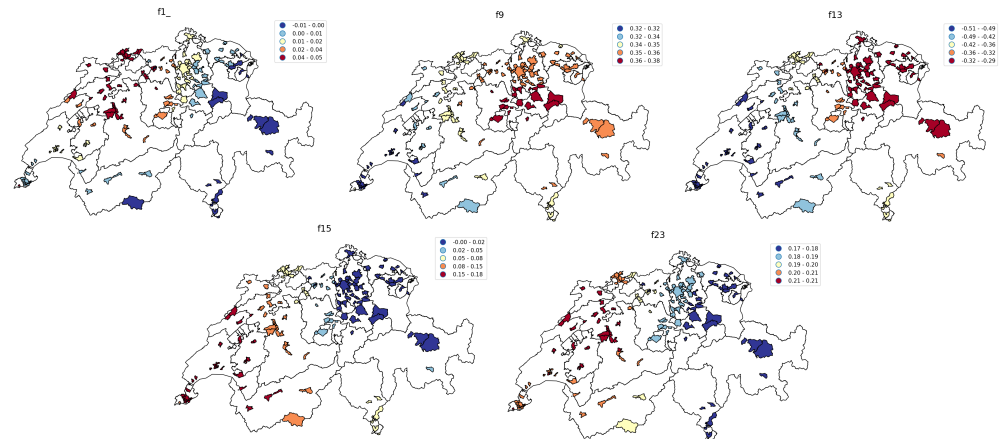

**Fig A.2.** GWR coefficients for all the features extracted as predictors for the variable p2.

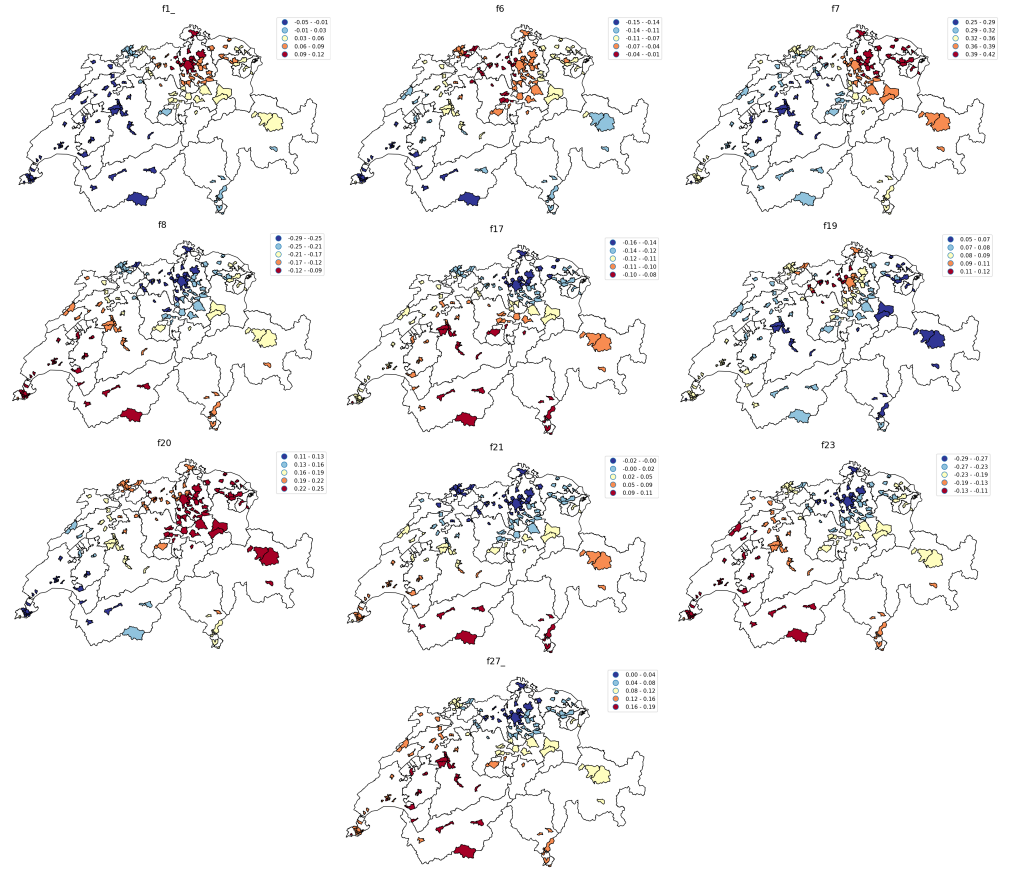

**Fig A.3.** GWR coefficients for all the features extracted as predictors for the variable **t1**.

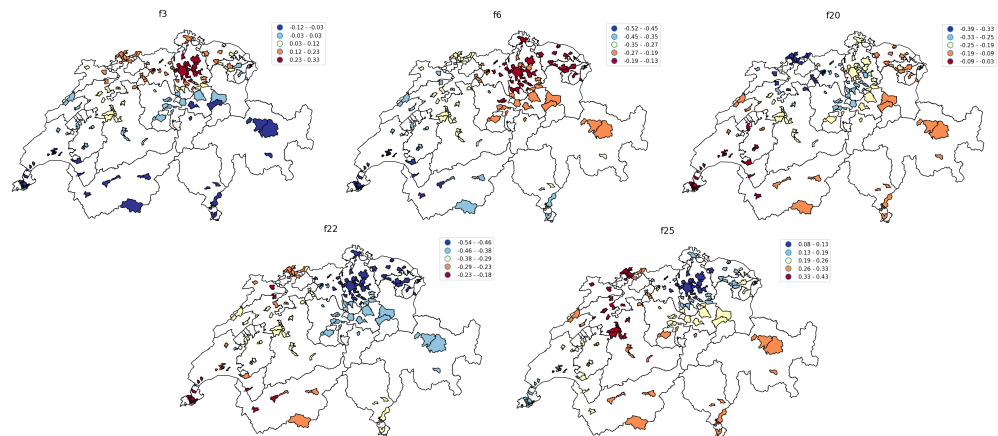

**Fig A.4.** GWR coefficients for all the features extracted as predictors for the variable **t2**.

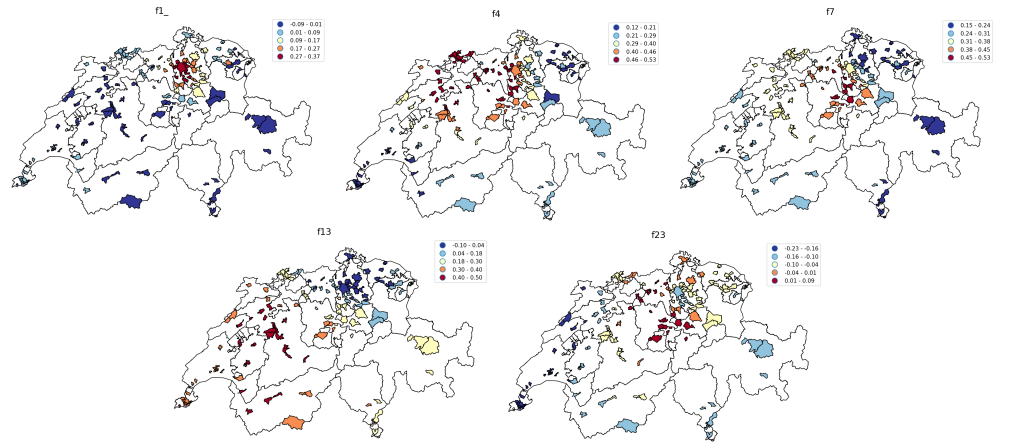

**Fig A.5.** GWR coefficients for all the features extracted as predictors for the variable **w1**.

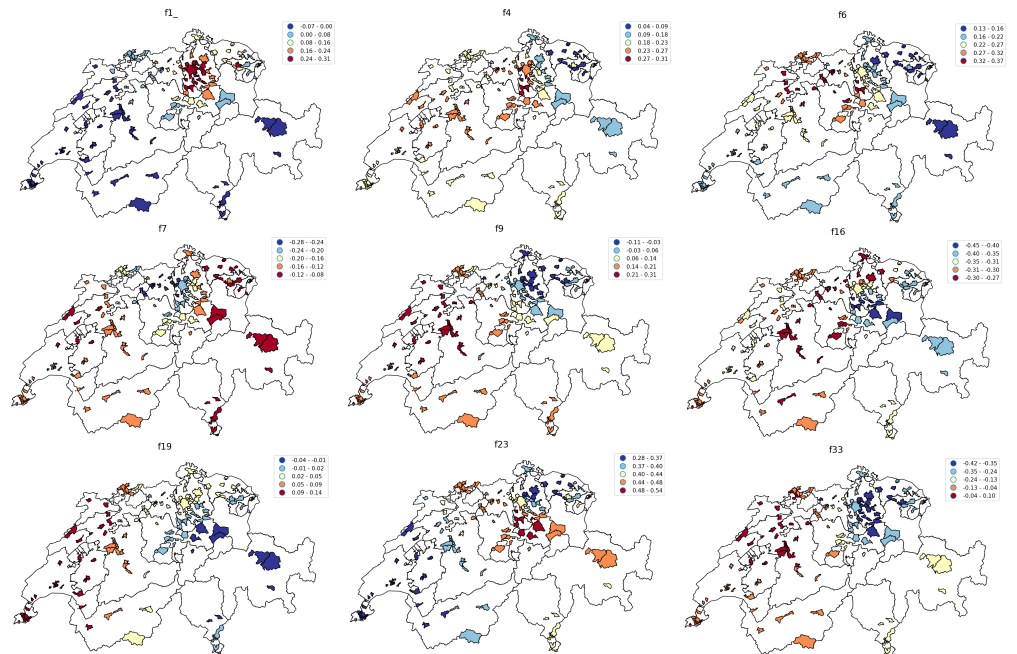

**Fig A.6.** GWR coefficients for all the features extracted as predictors for the variable **w2**.



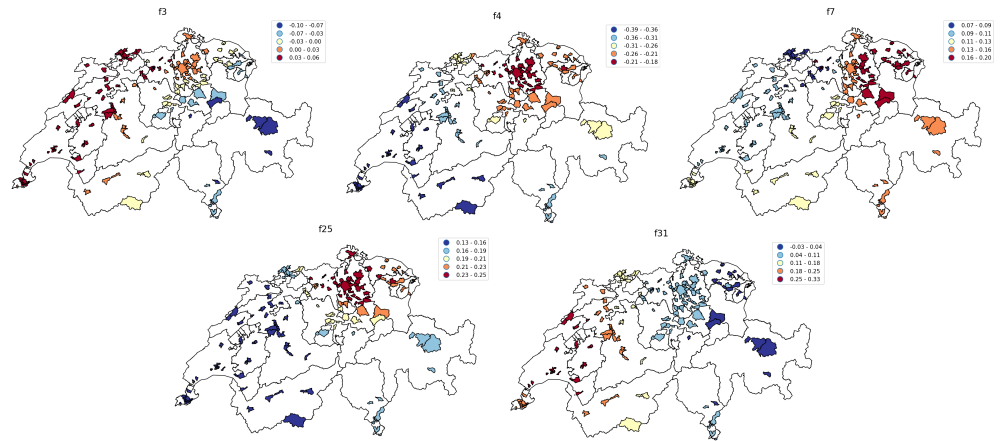

Fig A.7. GWR coefficients for all the features extracted as predictors for the variable  $s_1$ .

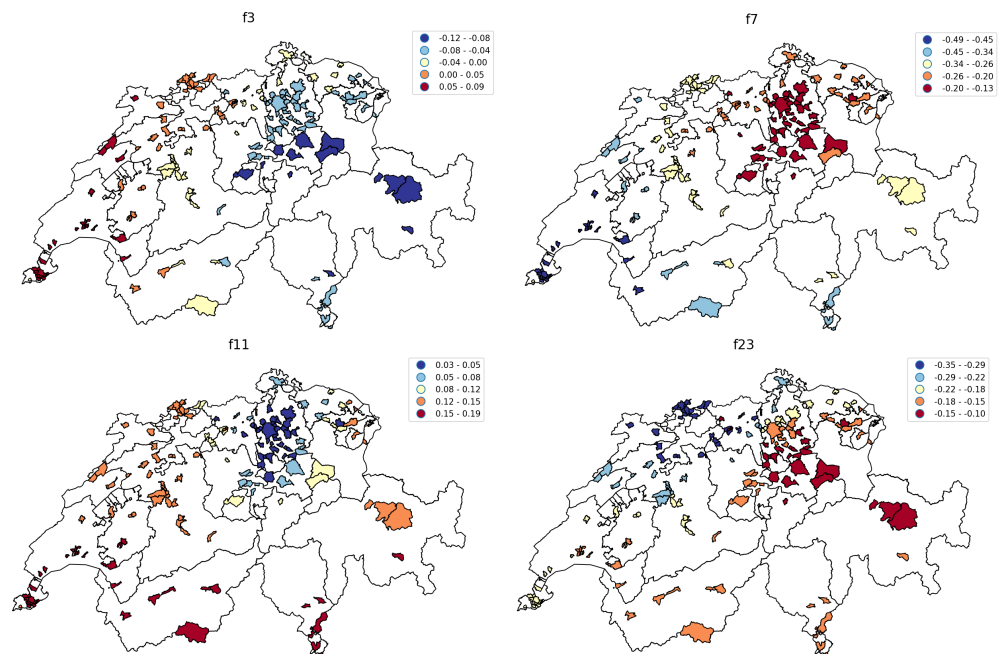

Fig A.8. GWR coefficients for all the features extracted as predictors for the variable  $s_2$ .

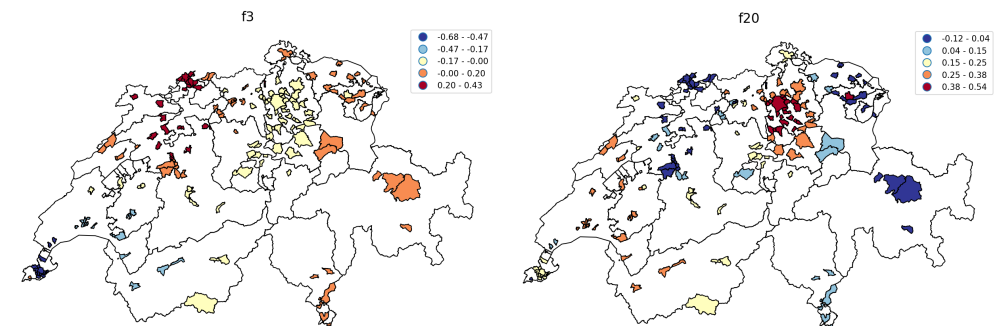

Fig A.9. GWR coefficients for all the features extracted as predictors for the variable  $h_1$ .

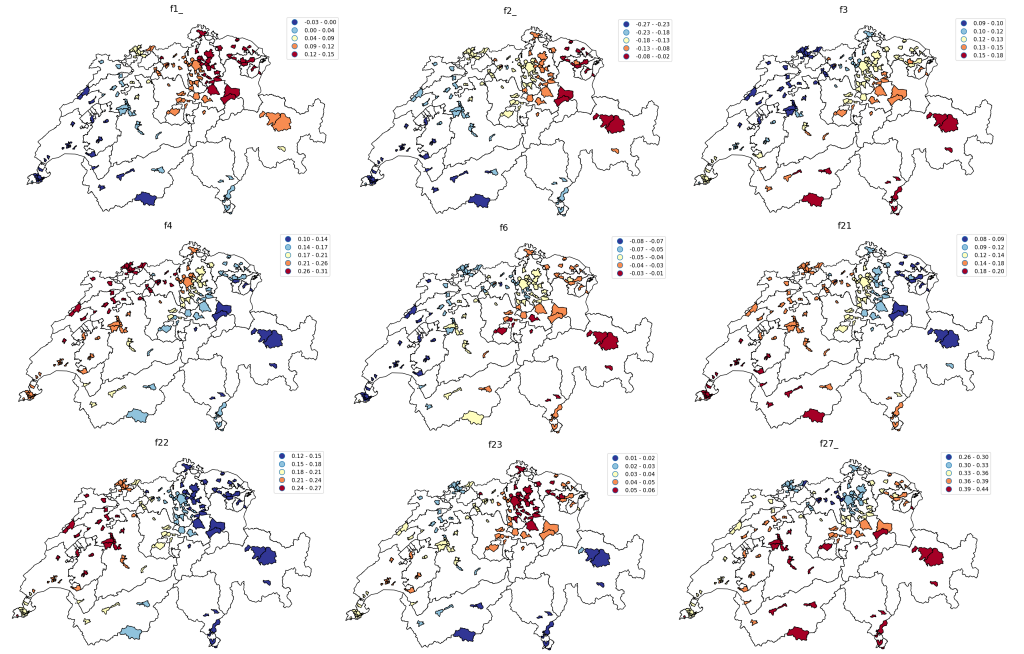

**Fig A.10.** GWR coefficients for all the features extracted as predictors for the variable **h2**.

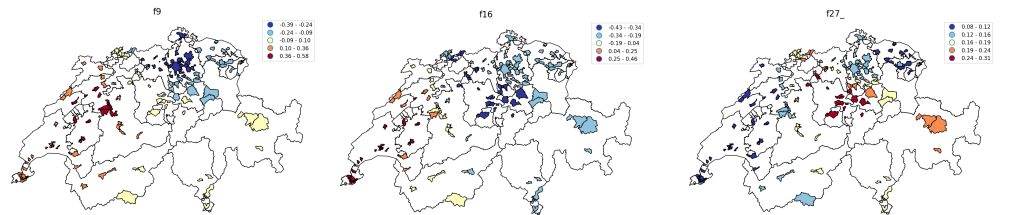

**Fig A.11.** GWR coefficients for all the features extracted as predictors for the variable **e1**.

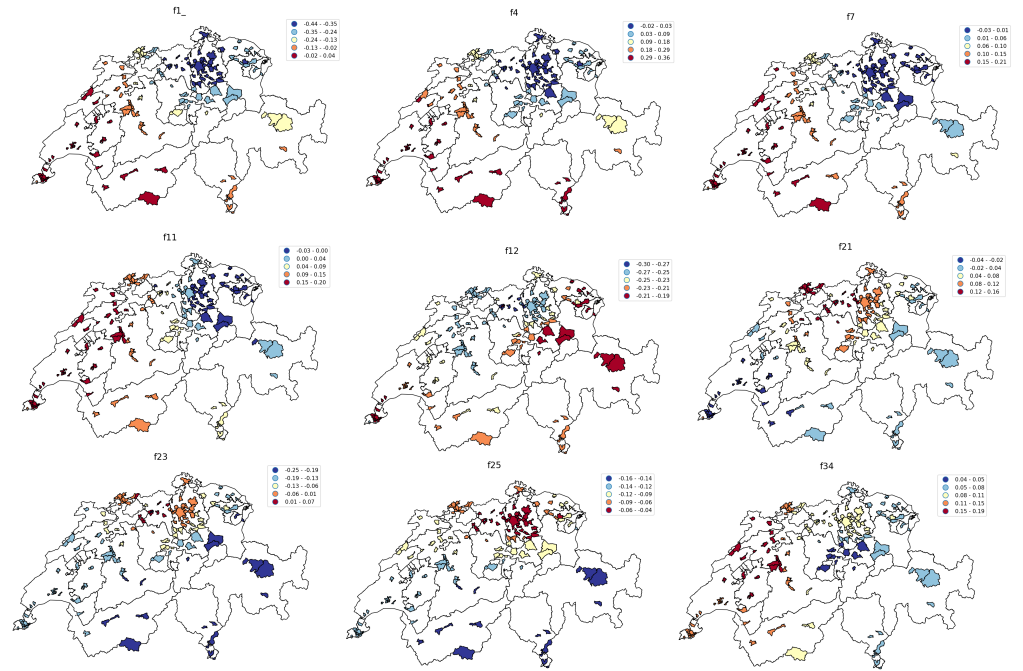

**Fig A.12.** GWR coefficients for all the features extracted as predictors for the variable e2.

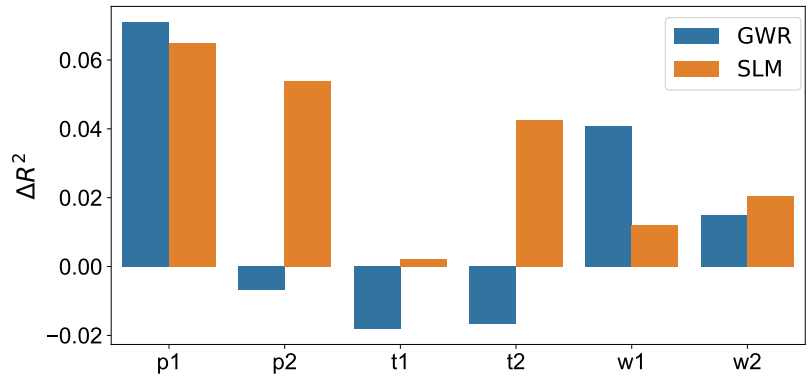

**Fig A.13.** Variation of the predictive performance due to the removal of not surprising features.
